# Supplementary material for: Facile synthesis of an iron doped rutile TiO2 photocatalyst for enhanced visible-light-driven water oxidation
Source: Royal Society of Chemistry journal article supplement (doi:10.1039/c5ta07003a), 2015-01-01
Supplement: c5ta07003a1.pdf [file c5ta07003a1.pdf]

## Supporting information

### Facile Synthesis of Iron Doped Rutile TiO<sub>2</sub> Photocatalyst for Enhanced Visible-light-driven Water Oxidation

Junqing Yan,<sup>a,c</sup> Yunxia Zhang,<sup>c</sup> Shengzhong Liu,<sup>\*c</sup> Guangjun Wu,<sup>a,c</sup> Landong Li<sup>\*a,b</sup>  
and Najjia Guan,<sup>a,b</sup>

<sup>a</sup> *School of Material Science and Engineering & National Institute for Advanced Materials, Nankai University, Tianjin, 30071, P.R. China*

<sup>b</sup> *Key Laboratory of Advanced Energy Materials Chemistry (Ministry of Education), Collaborative Innovation Center of Chemical Science and Engineering, Tianjin, 30071, P.R. China*

<sup>c</sup> *Key Laboratory of Applied Surface and Colloid Chemistry (Ministry of Education); Institute for Advanced Energy Materials, School of Materials Science and Engineering, Shaanxi Normal University, Xi'an, 710119, P. R. China*

\* To whom correspondence should be addressed

E-mail: szliu@dicp.ac.cn (S. Liu) & lild@nankai.edu.cn (L. Li)

## **Experiments and Methods**

### **Sample preparation**

All of the chemical reagents of analytical grade were purchased from Alfa Aesar Chemical Co. and used as received without further purification.

In a typical synthesis of Fe-TiO<sub>2</sub>, 10 mL titanium tetrachloride (TiCl<sub>4</sub>) was dropwise added into 30 mL ice water under stirring to prepare a transparent TiCl<sub>4</sub> aqueous solution. Then, a certain amount of ferric chloride (FeCl<sub>3</sub>) was added into the above solution. After further stirring for 30 min, the mixture was rapidly heated to 373 K to remove water and hydrogen chloride. The obtained light yellow powder was then calcinated in a muffle furnace at 773K in flowing air for 4h. The as-synthesized samples were further treated by 0.01M hydrochloric acid aqueous solution reflux at 343K for 4h to remove the surface iron oxides. The final iron content was analyzed through ICP-AES. The reference rutile TiO<sub>2</sub> was synthesized through a similar process but no FeCl<sub>3</sub> was added.

### **Characterization Techniques**

The X-ray diffraction (XRD) patterns of studied samples were recorded on a Bruker D8 ADVANCE powder diffractometer using Cu-K radiation ( $\lambda = 0.1542$  nm) at a scanning rate of 4°/min in the region of  $2\theta = 20-80^\circ$ .

Raman analysis was carried out on a Renishaw InVia Raman spectrometer and the spectra were obtained with the green line of an Ar-ion laser (514.53 nm) in micro-Raman configuration.

Diffuse reflectance ultraviolet-visible (UV-Vis) spectra of studied samples (*ca.* 20

mg diluted in ca. 80 mg BaSO<sub>4</sub>) were recorded in the air against BaSO<sub>4</sub> in the region of 200-800 nm on a Varian Cary 300 UV-Vis spectrophotometer.

Transmission electron microscopy (TEM) images were taken on a FEI Tecnai G<sup>2</sup> F20 electron microscope at an acceleration voltage of 200 kV. A few drops of alcohol suspension containing the sample were placed on a carbon-coated copper grid, followed by evaporation at ambient temperature.

X-ray photoelectron spectra (XPS) were recorded on a Kratos Axis Ultra DLD spectrometer with a monochromated Al-K $\alpha$  X-ray source ( $h\nu=1486.6$  eV), hybrid (magnetic/electrostatic) optics and a multi-channel plate and delay line detector (DLD). All spectra were recorded by using an aperture slot of 300\*700 microns, survey spectra were recorded with a pass energy of 160 eV and high-resolution spectra with a pass energy of 40 eV. Accurate binding energies ( $\pm 0.1$  eV) were determined with respect to the position of the adventitious C 1s peak at 284.8 eV. Valence band XPS (VB XPS) of samples were measured on PHI Quantera XPS Scanning Microprobe spectrometer using Al-K $\alpha$  X-ray source ( $h\nu=1486.6$  eV). The energy scales are aligned by using the Fermi level of the XPS instrument (4.10 eV versus absolute vacuum value).

Mott-Schottky plots were obtained using a three-electrode cell electrochemical workstation (IVIUM CompactStat). The saturated Ag/AgCl and platinum foil (2 $\times$ 2 cm<sup>2</sup>) were used as the reference electrode and the counter electrode, respectively. The sample of 1 mg was dispersed in 1 mL anhydrous ethanol and then evenly grinded to slurry. The slurry was spread onto ITO glass and the exposed area was kept at 0.25

cm<sup>2</sup>. The prepared ITO/samples was dried overnight under ambient conditions and then used as the working electrode. The measurements were carried out at a fixed frequency of 1 kHz in 0.5 M Na<sub>2</sub>SO<sub>4</sub> solution in the dark.

Scanning electron microscopy (SEM) images of samples were taken on a field emission scanning electron microscope (FE-SEM, Hitachi S-4800).

### **Photocatalytic evaluation**

Photocatalytic oxygen evolution was performed in a top-irradiation-type Pyrex reaction cell connected to a closed gas circulation and evacuation system under the irradiation of Xe lamp with different optical reflector and/or filter. In a typical experiment, catalyst sample of 100 mg was suspended in *ca.* 100 mL 0.01 M AgNO<sub>3</sub> aqueous solution in the reaction cell. After evacuated for 30 min, the reactor cell was irradiated at a constant temperature of 298 K under stirring. The gaseous products were analyzed by an on-line gas chromatograph (Varian CP-3800) with a thermal conductivity detector.

The apparent quantum yield was measured using the same experimental setup for the photocatalytic oxygen evolution, but with additional band pass filters to obtain monochromatic light ( $\lambda=350, 405, 420, 475, 550$  nm and 700nm). The power density was measured to be *ca.* 1.8 ( $\lambda=405$  nm), 1.5 ( $\lambda=420$  nm) or 1.6 mW/cm<sup>2</sup> ( $\lambda=475$  nm) using a calibrated photodiode and the quantum yield was calculated by the following equation:

$$QY = \frac{\text{number of reacted electrons}}{\text{number of incident photons}} * 100\% = \frac{\text{number of evolved } O_2 \text{ molecules} * 4}{\text{number of incident photons}} * 100\%$$

Photocatalytic Rhodamine B (RhB) degradation was performed in a top-irradiation-

type Pyrex reaction cell. In a typical experiment, catalyst sample of 50 mg was suspended in *ca.* 100 mL of 8 mg/L the RhB and stirred for 5 h to establish an adsorption and desorption equilibrium. Then, the reactor cell was irradiated at a constant temperature of 298 K under stirring with oxygen bubbled in. The supernatant was analyzed on a Hitachi U-3900/3900H spectrophotometer.

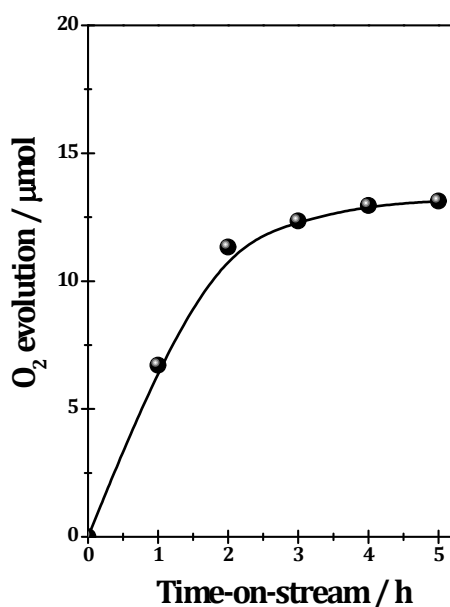

**Figure S1** Visible-light-driven water oxidation to oxygen over sub-10 nm rutile TiO<sub>2</sub>  
Reaction conditions: 0.1g photocatalyst, 100 mL 0.01M AgNO<sub>3</sub> aqueous solution

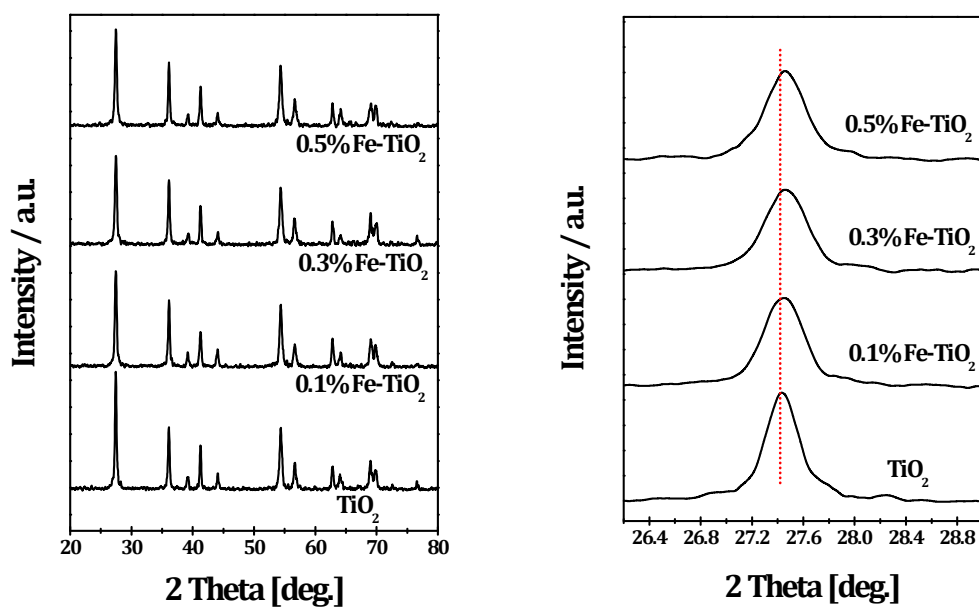

**Figure S2** XRD patterns of rutile  $\text{TiO}_2$  and Fe doped rutile  $\text{TiO}_2$  under study and the magnified view of (110) reflection

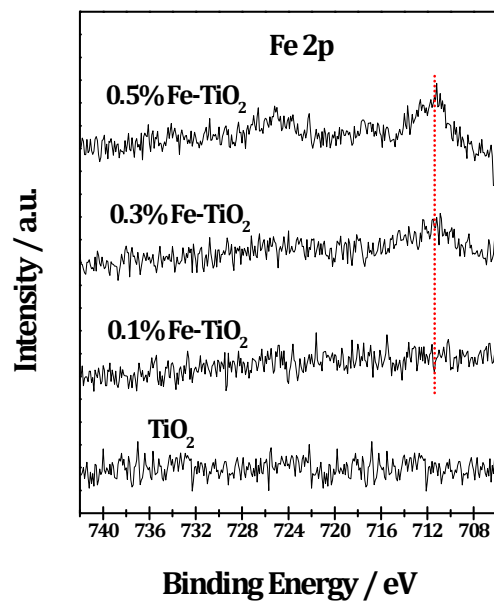

**Figure S3** Fe 2p core-level XP spectra of rutile  $\text{TiO}_2$  and Fe doped rutile  $\text{TiO}_2$  samples

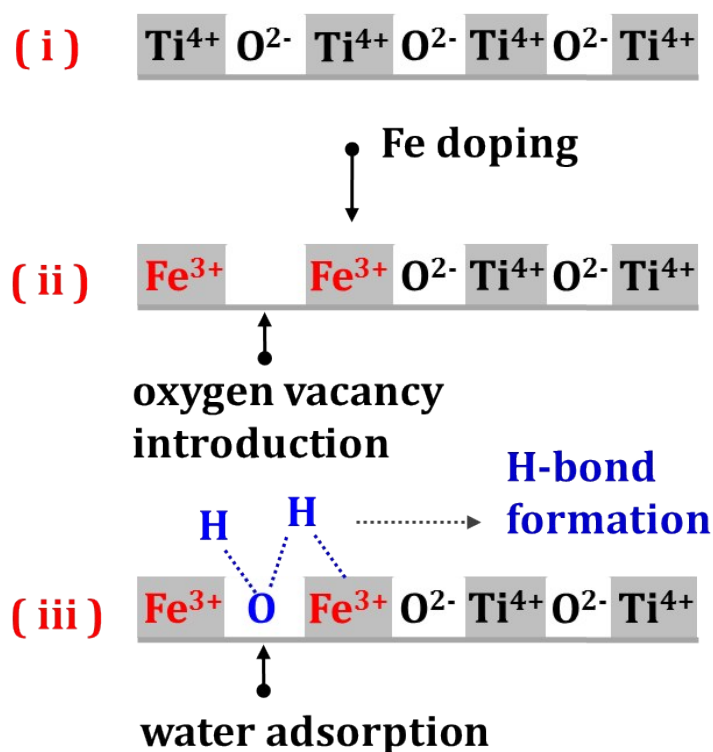

**Figure S4** Mode of Fe doping into rutile  $\text{TiO}_2$  lattice and the formation of oxygen vacancy for water adsorption

Owing to the difference in the valence electrons of iron and titanium elements, one  $\text{Fe}^{3+}$  replacing one  $\text{Ti}^{4+}$  will, theoretically, create one oxygen vacancy in rutile  $\text{TiO}_2$  (ii). The oxygen vacancy is the preferred water adsorption site. With one water molecule insert into the oxygen vacancy site, the neighboring  $\text{Fe}^{3+}$  will act as the electron scavenger and adsorb the hydrogen of the adsorbed water with the formation of the H-bond (iii).

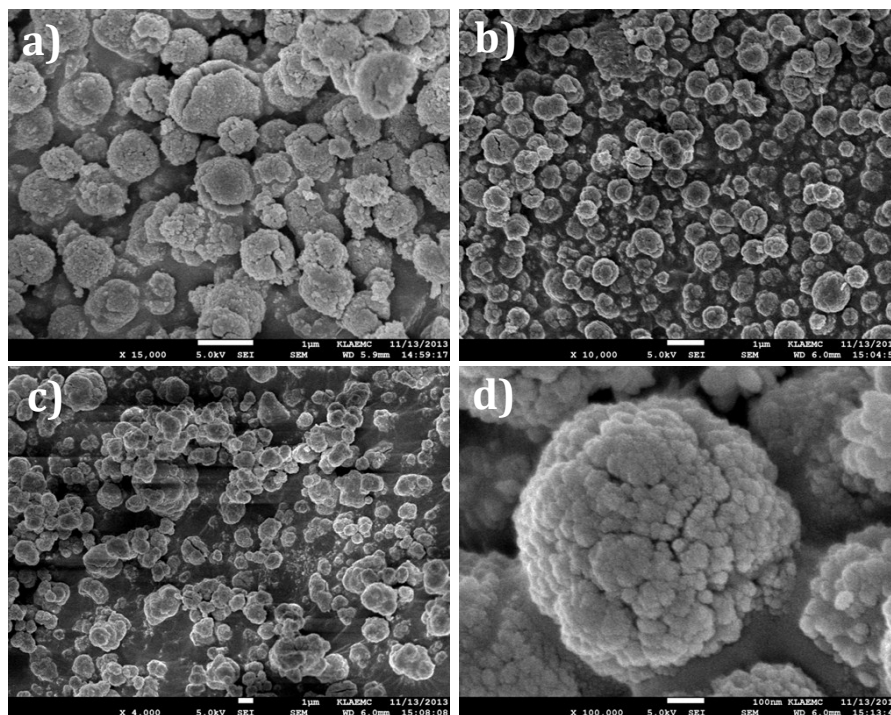

**Figure S5** (a, b, c) SEM images of 0.1%Fe-TiO<sub>2</sub>, 0.3%Fe-TiO<sub>2</sub> and 0.5%Fe-TiO<sub>2</sub>; (d) Enlarged view of 0.3%Fe-TiO<sub>2</sub> sample

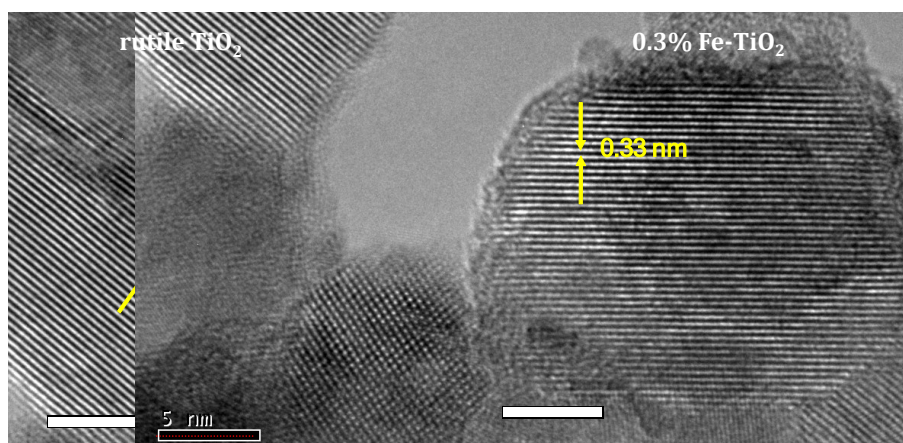

**Figure S6** HRTEM images of rutile TiO<sub>2</sub> and 0.3%Fe-TiO<sub>2</sub>



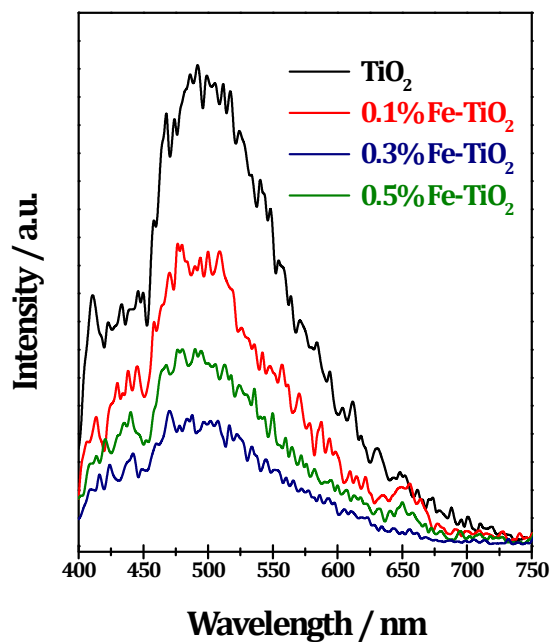

**Figure S7** Photoluminescence spectra of rutile  $\text{TiO}_2$  and Fe doped rutile  $\text{TiO}_2$

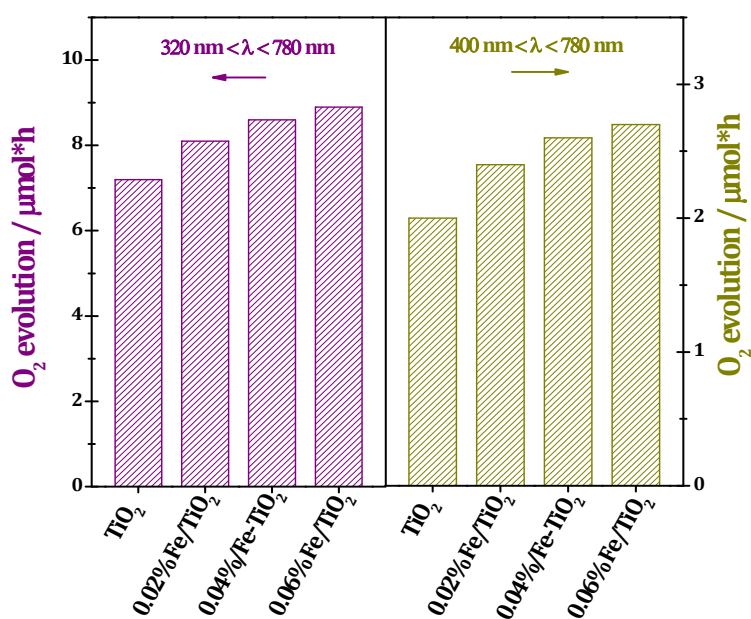

**Figure S8** Photocatalytic oxygen evolution from water splitting over rutile  $\text{TiO}_2$  and iron surface modified  $\text{TiO}_2$  samples under the irradiation of UV-vis or visible light  
Reaction conditions: 0.1g photocatalyst, 100 mL 0.01M  $\text{AgNO}_3$  aqueous solution

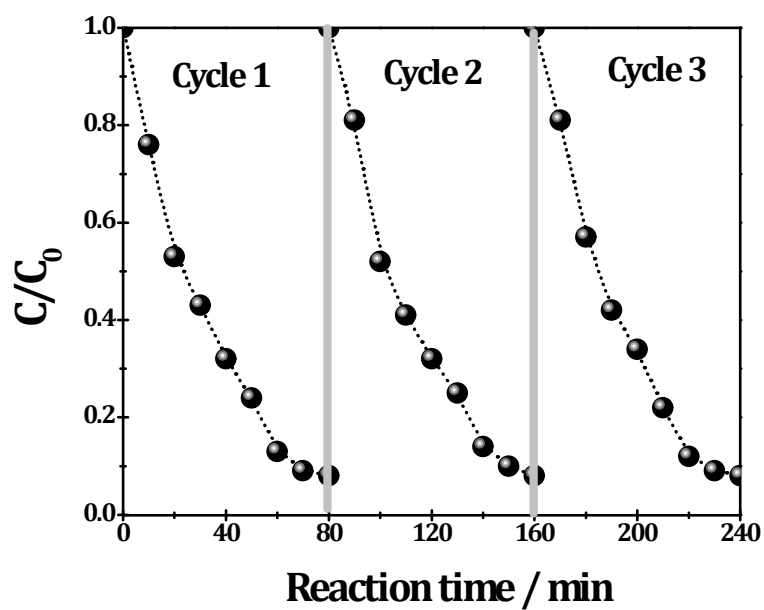

**Figure S9** Recycling experiments of RhB degradation over 0.3%Fe-TiO<sub>2</sub> under visible light.

Reaction conditions: 0.05g 0.3%Fe-TiO<sub>2</sub> in 100 mL of 8 mg/L

RhB aqueous solution;  $\lambda = 400-780$  nm
